# Supplementary material for: Effects of mPEG-DSPE/corannulene or perylene nanoparticles on the ovary and oocyte
Source: Royal Society of Chemistry journal article supplement (doi:10.1039/d0ra02129f), 2020-01-01
Supplement: d0ra02129f1.pdf [file d0ra02129f1.pdf]

***Supplementary material***

**Effects of mPEG-DSPE/corannulene or perylene nanoparticles on the  
ovary and oocyte**

Hongyu Wang <sup>a, c, \*</sup>, Jingwen Zhang <sup>a, \*</sup>, Daofu Feng <sup>b, †</sup> and Xizeng Feng <sup>a, †</sup>

<sup>a</sup> College of Life Science, The Key Laboratory of Bioactive Materials, Ministry of Education, State Key Laboratory of Medicinal Chemical Biology, Nankai University, Tianjin 300071, China.

<sup>b</sup> Department of General Surgery, Tianjin Medical University General Hospital, No.154 Anshan Road, Tianjin 300052, China.

<sup>c</sup> Current work address: Institute of Tropical Bioscience and Biotechnology, Chinese Academy of Tropical Agricultural Sciences, Haikou 571101, China.

\* These authors contributed equally to this work.

† Corresponding author. Email addresses: xzfeng@nankai.edu.cn (X. Z. Feng)

jerryfenglc@sina.com (D. F. Feng)

**Table S1** List of qRT-PCR primers.

| <b>Gene</b>      | <b>Forward primer</b>  | <b>Reverse primer</b> |
|------------------|------------------------|-----------------------|
| <i>atg14</i>     | TCATATTCCCAATCGACGAAG  | CATCACAGACCCATCTTCCA  |
| <i>bax</i>       | ATGCGTCCACCAAGAAGC     | CCAGTTGAAGTTGCCATCAG  |
| <i>beclin</i>    | GCTCAGTACCAGCGGGAGTAT  | CAAGCGACCCAGTCTGAAAT  |
| <i>cat</i>       | GTGTTGAACGAGGAGGAGAG   | CTGCGTGTAGGTGTGAATTG  |
| <i>caspase-3</i> | AAAGGCTGGAACCCTTGTTT   | GCACCTTGCCTTCAATGAGT  |
| <i>gpx</i>       | TTGAGAAAGGAGATGTGAACGG | CAAAGTTCCAGCGGATGTCA  |
| <i>lc3</i>       | CATGAGCGAGTTGGTCAAGA   | TTGACTCAGAAGCCGAAGGT  |
| <i>sod2</i>      | AACAATCTCAACGCCACCG    | AGTCACGCTTGATAGCCTCCA |
| <i>gapdh</i>     | GGTTGTCTCCTGCGACTTCA   | TAGGGCCTCTCTTGCTCAGT  |

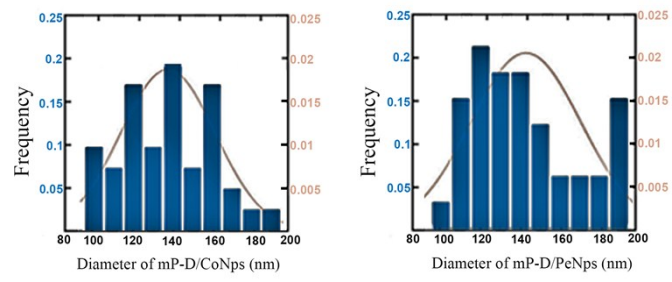

Fig.S1 Frequency distribution map of nanoparticles of different sizes.

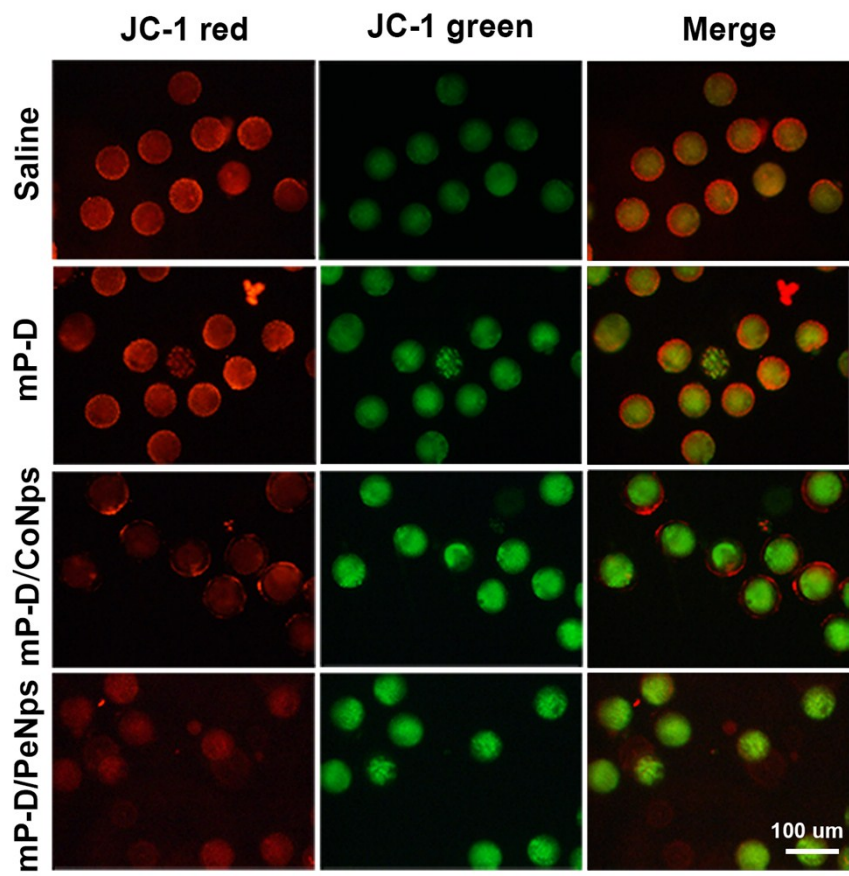

Fig. S2 mP-D/CoNps or PeNps treatment have effect on the mitochondria function. The fluorescence photographs of mitochondrial membrane potential detected by JC-1 in saline, mP-D, mP-D/CoNps and mP-D/PeNps groups. Scale bar indicates 100  $\mu$ m.
